# Supplementary material
Source: PubMed Central journal article supplement (PMC9991964)
Supplement: NIHMS1857405-supplement-1.pdf [file NIHMS1857405-supplement-1.pdf]

## SUPPLEMENTAL MATERIAL

**Supplemental Table 1.** Current Procedural Terminology lab codes included as “genetic tests.”

| Current Procedural Terminology lab codes | Name of Test                                                                                      |
|------------------------------------------|---------------------------------------------------------------------------------------------------|
| 381000                                   | Cytogenetics, unspecified                                                                         |
| 381010                                   | Chromosome analysis                                                                               |
| 381015                                   | Tissue culture for chromosome analysis                                                            |
| 381020                                   | Fragile X                                                                                         |
| 381099                                   | Other specified cytogenetics                                                                      |
| 382010                                   | Molecular extraction                                                                              |
| 382030                                   | Molecular separation                                                                              |
| 382040                                   | Nucleic acid probe                                                                                |
| 382050                                   | Polymerase chain reaction (PCR)                                                                   |
| 382060                                   | Molecular diagnostics interpretation and report                                                   |
| 382070                                   | In situ hybridization                                                                             |
| 382081                                   | Chromosomal microarray                                                                            |
| 382082                                   | Duplication/deletion                                                                              |
| 382048                                   | Mutation ID                                                                                       |
| 382100                                   | Molecular pathology procedure, level 1 (includes single germline variant)                         |
| 382110                                   | Molecular pathology procedure, level 2 (includes methylated variant, somatic variant, 2-10 SNPs)  |
| 382120                                   | Molecular pathology procedure, level 3 (includes >10 SNPs, methylated variants, somatic variants) |
| 382130                                   | Molecular pathology procedure, level 4                                                            |
| 382140                                   | Molecular pathology procedure, level 5                                                            |
| 382150                                   | Molecular pathology procedure, level 6                                                            |
| 382160                                   | Molecular pathology procedure, level 7                                                            |
| 382170                                   | Molecular pathology procedure, level 8                                                            |
| 382180                                   | Molecular pathology procedure, level 9                                                            |
| 383000                                   | Sequencing, unspecified                                                                           |
| 383001                                   | DNA sequencing                                                                                    |
| 383006                                   | Next generation sequencing (NGS)                                                                  |
| 383011                                   | Sanger sequencing                                                                                 |
| 383012                                   | Bi-directional sanger sequencing                                                                  |
| 383099                                   | Other specified sequencing                                                                        |

Legend: A medical geneticist curated a list of 29 Current Procedural Terminology lab codes that

denote genetic testing

**Supplemental Table 2. Hospital-level information about admissions per year and genetic testing percentage.**

| Hospital Number | Number of Admissions Per Year (Mean) | Percentage of Patients Tested (Unadjusted) | Percentage of Patients Tested (Adjusted) |
|-----------------|--------------------------------------|--------------------------------------------|------------------------------------------|
| 1001            | 1569                                 | 6%                                         | 6%                                       |
| 1005            | 474                                  | 38%                                        | 38%                                      |
| 1007            | 391                                  | 15%                                        | 15%                                      |
| 1010            | 510                                  | 15%                                        | 15%                                      |
| 1011            | 414                                  | 22%                                        | 22%                                      |
| 1012            | 1685                                 | 4%                                         | 4%                                       |
| 2001            | 991                                  | 9%                                         | 9%                                       |
| 2002            | 451                                  | 12%                                        | 12%                                      |
| 2004            | 562                                  | 17%                                        | 17%                                      |
| 2005            | 602                                  | 13%                                        | 13%                                      |
| 2007            | 167                                  | 40%                                        | 40%                                      |
| 2008            | 2207                                 | 10%                                        | 10%                                      |
| 2009            | 781                                  | 21%                                        | 21%                                      |
| 2012            | 385                                  | 20%                                        | 20%                                      |
| 2013            | 528                                  | 14%                                        | 14%                                      |
| 2015            | 1902                                 | 13%                                        | 13%                                      |
| 2016            | 611                                  | 23%                                        | 23%                                      |
| 2017            | 824                                  | 17%                                        | 17%                                      |
| 2020            | 790                                  | 30%                                        | 30%                                      |
| 2021            | 447                                  | 14%                                        | 14%                                      |
| 2022            | 973                                  | 19%                                        | 19%                                      |
| 2023            | 1777                                 | 10%                                        | 10%                                      |
| 2027            | 448                                  | 17%                                        | 17%                                      |
| 2028            | 303                                  | 27%                                        | 26%                                      |
| 2029            | 338                                  | 30%                                        | 29%                                      |
| 2033            | 442                                  | 15%                                        | 15%                                      |
| 2036            | 1029                                 | 10%                                        | 10%                                      |
| 2037            | 651                                  | 16%                                        | 16%                                      |
| 3001            | 253                                  | 7%                                         | 8%                                       |
| 3002            | 1009                                 | 6%                                         | 6%                                       |
| 3004            | 649                                  | 6%                                         | 6%                                       |
| 3005            | 1874                                 | 7%                                         | 7%                                       |
| 3006            | 1125                                 | 13%                                        | 13%                                      |
| 3008            | 448                                  | 7%                                         | 7%                                       |
| 3009            | 1357                                 | 4%                                         | 4%                                       |
| 3010            | 1184                                 | 12%                                        | 12%                                      |
| 3011            | 488                                  | 31%                                        | 30%                                      |
| 3014            | 743                                  | 16%                                        | 16%                                      |

Legend: PHIS Hospital Number and associated percentage of patients tested (unadjusted and adjusted for patient-level characteristics) and number of admissions per year.

**Supplemental Figure 1.** Mean number of tests sent per hospital for patients who had at least one genetic test sent.

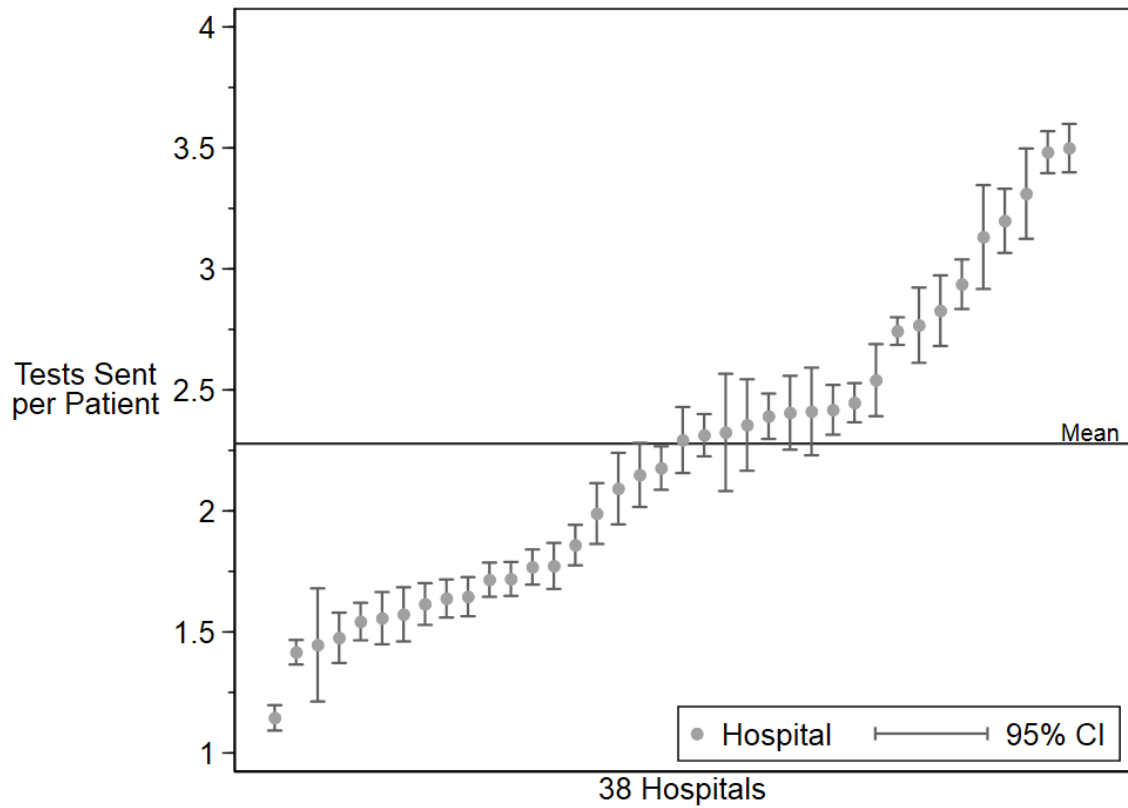

Legend: Each point represents a hospital and error bars indicate 95% confidence intervals.

**Supplemental Table 3. Most common genetic diagnoses.**

| <b>Diagnosis</b>                          | <b>Frequency in dataset</b> |
|-------------------------------------------|-----------------------------|
| Down syndrome                             | 3,943                       |
| Other specified chromosomal abnormalities | 1,040                       |
| Di George Syndrome                        | 906                         |
| Indeterminate Sex                         | 743                         |
| Trisomy 18                                | 622                         |
| Other deletions from the autosomes        | 591                         |
| Other microdeletions                      | 471                         |
| Congenital adrenogenital disorders        | 443                         |
| Velo-cardio-facial syndrome               | 431                         |
| Chromosomal abnormality                   | 416                         |

Legend: Two medical geneticists, one of whom is also a neonatologist, reviewed all international classification of disease (ICD) diagnoses and coded them as “genetic” if they were associated with an 80% chance of having a genetic etiology confirmable with molecular analysis. Discrepancies were resolved by consensus. This table displays the ten most common genetic diagnoses among all patients in our dataset and associated frequencies.

**Supplemental Figure 2.** Relationship between percentage of patients who receive genetic testing and mean number of patients admitted per year.

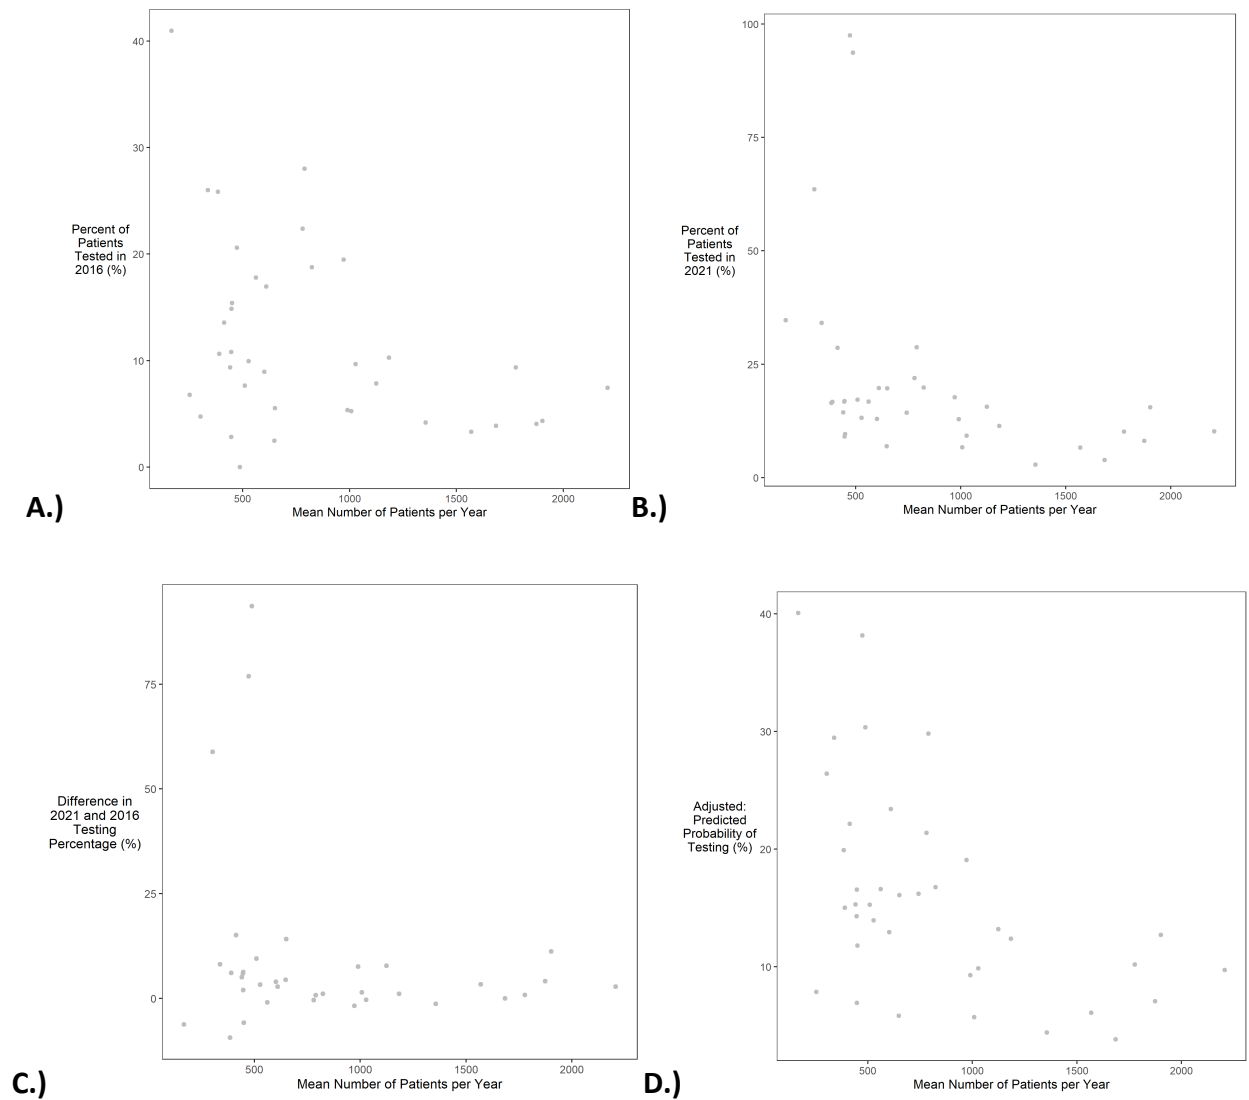

Legend: The scatterplots display the percentage of patients who receive genetic testing in 2016 (Panel A), in 2021 (Panel B), change over this period (Panel C), and adjusted using multilevel model (Panel D) versus the hospital's mean number of patients admitted per year. The highest testing hospitals have fewer patients per year, but mean patients per year loses significance after controlling for patient-level effects.

**Supplemental Table 4.** Differences between patients who did and did not receive genetic testing

| Risk Factor                           | Unadjusted                                        |                                               |         | Adjusted         |        |      |         |
|---------------------------------------|---------------------------------------------------|-----------------------------------------------|---------|------------------|--------|------|---------|
|                                       | Patients without genetic testing (%<br>n=163,504) | Patients with genetic testing (%<br>n=24,521) | P-value | Odds Ratio       | 95% CI |      | P-value |
| <b>In-hospital Mortality</b>          | 2.9                                               | 9.6                                           | <.001   | 3.10             | 2.88   | 3.33 | <.001   |
| <b>Complex Chronic Condition Flag</b> | 48.0                                              | 90.6                                          | <0.001  | 3.85             | 3.66   | 4.05 | <.001   |
| <b>Congenital anomaly flag</b>        | 5.1                                               | 29.4                                          | <.001   | 2.65             | 2.54   | 2.76 | <.001   |
| <b>APR-DRG Severity level</b>         |                                                   |                                               |         |                  |        |      |         |
| <b>0</b>                              | .5                                                | .4                                            | <.001   | 1.55             | 1.23   | 1.96 | <.001   |
| <b>1</b>                              | 21.3                                              | 5.0                                           |         | 0.86             | 0.80   | 0.92 |         |
| <b>2</b>                              | 28.8                                              | 12.5                                          |         | 1<br>[Reference] |        |      |         |
| <b>3</b>                              | 31.9                                              | 28.0                                          |         | 1.39             | 1.33   | 1.46 |         |
| <b>4</b>                              | 17.6                                              | 54.0                                          |         | 2.02             | 1.92   | 2.13 |         |
| <b>Gestational Age (weeks)</b>        | 36.1                                              | 35.3                                          | <.001   | 1.17             | 1.16   | 1.17 | <.001   |
| <b>Race</b>                           |                                                   |                                               |         |                  |        |      |         |
| <b>White</b>                          | 60.5                                              | 63.1                                          | <.001   | 1<br>[Reference] |        |      |         |
| <b>Black</b>                          | 21.4                                              | 18.9                                          |         | .90              | .87    | .94  | <0.001  |
| <b>Asian</b>                          | 5.0                                               | 4.2                                           |         | 1.04             | .94    | 1.10 | .734    |
| <b>American Indian</b>                | .4                                                | .6                                            |         | 1.07             | .86    | 1.33 | .557    |
| <b>Other</b>                          | 12.7                                              | 13.1                                          |         | 1.07             | 1.06   | 1.13 | 0.010   |
| <b>Length of Stay (weeks)</b>         | 3.2                                               | 7.0                                           | <.001   | 1.70             | 1.67   | 1.73 | <.001   |
| <b>Year of Admission</b>              |                                                   |                                               |         | 1.17             | 1.16   | 1.18 | <.001   |

Legend: Group characteristics and adjusted odds ratios from the multivariate model are

presented for patients who did and did not receive genetic testing.
